# Supplementary material for: Lactobacillus rhamnosus HN001 and Lactobacillus acidophilus La-14 Attenuate Gardnerella vaginalis-Infected Bacterial Vaginosis in Mice
Source: MDPI journal article supplement (doi:10.3390/nu9060531), 2017-05-23
Supplement: s1 [file s1]

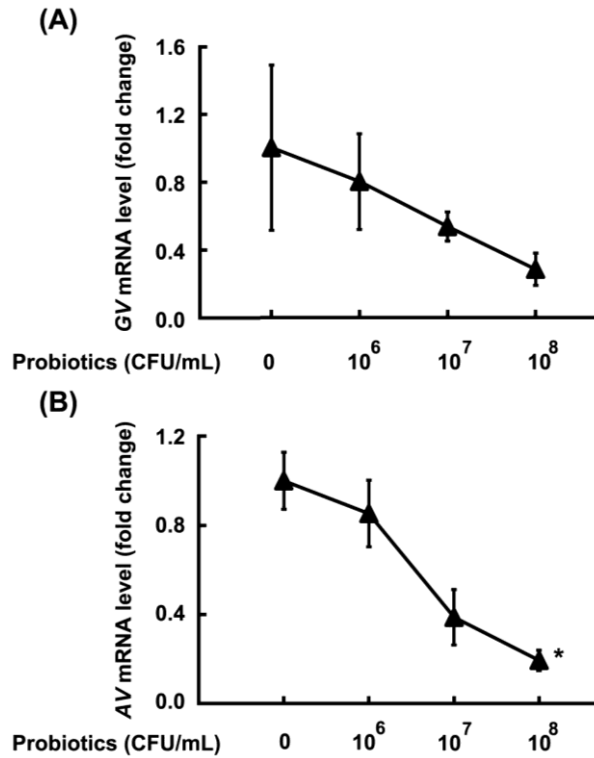

**Figure S1.** Effects of probiotic mixture (PM) on the viability of *Gardnerella vaginalis* (A) and *Atopobium vaginae* (B). The inoculum of *G. vaginalis* (GV) or *A. vaginae* (AV) contained  $1 \times 10^7$  CFU/mL. The pathogens were incubated without or with PM (closed triangle,  $1 \times 10^6$ ,  $1 \times 10^7$ ,  $1 \times 10^8$  CFU/mL) at  $37^\circ\text{C}$  for 24 h, and number of the survival. The numbers of GV and AV were assayed using qPCR. All data are expressed as mean  $\pm$  SD ( $n = 3$ ). All values are shown as the mean  $\pm$  SD ( $n = 4$ ). \* $p < 0.05$  vs. control group treated with GV or AV alone.

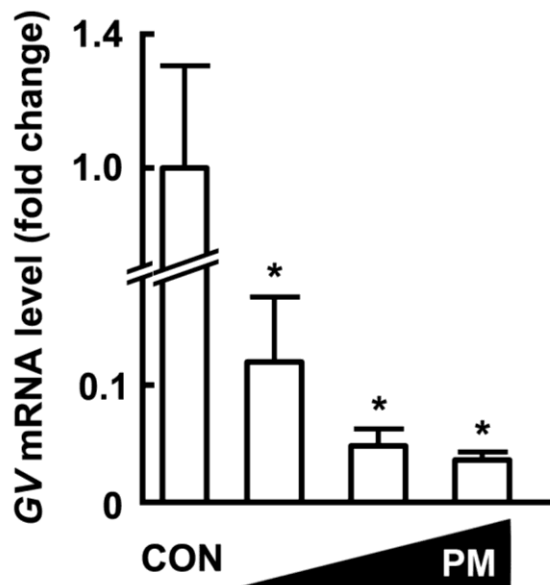

**Figure S2.** Effects of probiotic mixture (PM) on the adhesion of *Gardnerella vaginalis* (GV) to HeLa cells. GV ( $1 \times 10^7$  CFU/mL) was infected in HeLa cells ( $1 \times 10^7$  cells/mL), treated with probiotics (treated  $1 \times 10^5$ ,  $1 \times 10^6$ ,  $1 \times 10^7$  CFU/mL) 1 h after the infection of *G. vaginalis*, incubated at  $37^\circ\text{C}$  in 10%  $\text{CO}_2$ -90% air for 24 h, and then washed three times with saline. The numbers of *G. vaginalis* were assayed using qPCR. All data are expressed as mean  $\pm$  S.D. ( $n = 4$ ). \* $p < 0.05$  vs. control treated with GV alone.
